# Supplementary material for: Activation of Protein Kinase G After Repeated Cocaine Administration Is Necessary for the Phosphorylation of α-Amino-3-Hydroxy-5-Methyl-4-Isoxazolepropionic Acid Receptor GluA1 at Serine 831 in the Rat Nucleus Accumbens
Source: Front Mol Neurosci. 2018 Jul 30;11:263. doi: 10.3389/fnmol.2018.00263 (PMC6077228; doi:10.3389/fnmol.2018.00263)
Supplement: Supplementary file 1 [file Table_1.pdf]

## *Supplementary Material*

# **Activation of protein kinase G after repeated cocaine administration is necessary for the phosphorylation of $\alpha$ -amino-3-hydroxy-5-methyl-4-isoxazolepropionic acid receptor GluA1 at serine 831 in the rat nucleus accumbens**

**Ju Hwan Yang<sup>†,1</sup>, Su Yeon Seo<sup>†,1,2</sup>, Jeong Hwan Oh<sup>1,3</sup>, In Soo Ryu<sup>1,4</sup>, Jieun Kim<sup>1</sup>, Dong Kun Lee<sup>5</sup>, Yeonhee Ryu<sup>2</sup>, Eun Sang Choe<sup>1,\*</sup>**

<sup>1</sup>Department of Biological Sciences, Pusan National University, South Korea

<sup>2</sup>Korea Institute of Oriental Medicine, South Korea

<sup>3</sup>Institute of Fisheries Sciences, Pukyong National University, South Korea

<sup>4</sup>Substance Abuse Pharmacology Group, Korea Institute of Toxicology, South Korea

<sup>5</sup>Department of Physiology, School of Medicine and Institution of Health Sciences, Gyeongsang National University, South Korea

<sup>†</sup>Equal contributors

**\* Correspondence:** Eun Sang Choe, [eschoe@pusan.ac.kr](mailto:eschoe@pusan.ac.kr)

**Supplementary Table S1.** Rates of changes in the immunoreactivity of pGluA1-S831 in the NAc after repeated systemic injections of saline or cocaine at different time points

|            | Repeated saline  | Repeated cocaine                  |
|------------|------------------|-----------------------------------|
| Time (min) | Mean $\pm$ SEM   |                                   |
| 5          | 100 $\pm$ 15.412 | 127.33 $\pm$ 39.443               |
| 10         | 100 $\pm$ 12.428 | 129.873 $\pm$ 6.131               |
| 30         | 100 $\pm$ 16.493 | 422.652 $\pm$ 52.047*             |
| 60         | 100 $\pm$ 23.862 | 264.855 $\pm$ 24.21*              |
| 120        | 100 $\pm$ 4.517  | 164.846 $\pm$ 15.488 <sup>#</sup> |
| 240        | 100 $\pm$ 5.722  | 121.777 $\pm$ 3.903 <sup>#</sup>  |

\* $p < 0.05$  vs. repeated saline group at the same time point; <sup>#</sup> $p < 0.05$  vs. repeated cocaine group at the 30 min time point.

**Supplementary Table S2.** Rates of changes in the immunoreactivity of pGluA1-S831 in the NAc after intra-NAc infusion of KT5823 or Rp-cGMP prior to the final injection of saline or cocaine

|           |         | Repeated saline     | Repeated cocaine                  |
|-----------|---------|---------------------|-----------------------------------|
| Treatment |         | Mean $\pm$ SEM      |                                   |
| WB        | Vehicle | 100 $\pm$ 14.02     | 260.8 $\pm$ 22.053 <sup>*</sup>   |
|           | KT5823  | 114.225 $\pm$ 3.383 | 123.575 $\pm$ 14.446 <sup>#</sup> |
|           | Rp-cGMP | 113.2 $\pm$ 2.587   | 88.3 $\pm$ 14.849 <sup>#</sup>    |
| IHC       | Vehicle | 100 $\pm$ 3.095     | 193.1 $\pm$ 11.656 <sup>*</sup>   |
|           | KT5823  | 111.525 $\pm$ 4.509 | 111.025 $\pm$ 8.742 <sup>#</sup>  |
|           | Rp-cGMP | 107.025 $\pm$ 6.716 | 113.225 $\pm$ 7.035 <sup>#</sup>  |

<sup>\*</sup> $p < 0.05$  vs. repeated saline vehicle group; <sup>#</sup> $p < 0.05$  vs. repeated cocaine vehicle group; WB, western immunoblotting; IHC, immunohistochemistry.

**Supplementary Table S3.** Rates of changes in number of co-localization of pGluA1-S831 with NeuN in the NAc after the intra-NAc infusion of KT5823 or Rp-cGMP prior to the final injection of saline or cocaine

|           | Repeated saline    | Repeated cocaine                |
|-----------|--------------------|---------------------------------|
| Treatment | Mean $\pm$ SEM     |                                 |
| Vehicle   | 100 $\pm$ 2.68     | 184.895 $\pm$ 3.815*            |
| KT5823    | 99.248 $\pm$ 4.4   | 95.873 $\pm$ 4.09 <sup>#</sup>  |
| Rp-cGMP   | 106.62 $\pm$ 5.262 | 88.951 $\pm$ 4.784 <sup>#</sup> |

\* $p < 0.05$  vs. repeated saline vehicle group; <sup>#</sup> $p < 0.05$  vs. repeated cocaine vehicle group.

**Supplementary Table S4.** Rates of changes in the immunoreactivity of PKG, pGluA1-S831 or GluA1 in the GluA1 precipitate of the NAc after the repeated systemic injections of saline or cocaine

|                        | Repeated saline | Repeated cocaine   |
|------------------------|-----------------|--------------------|
| Treatment              | Mean $\pm$ SEM  |                    |
| PKG                    | 100 $\pm$ 5.289 | 228.4 $\pm$ 13.16* |
| pGluA1 <sup>S831</sup> | 100 $\pm$ 11.53 | 202 $\pm$ 9.809*   |
| GluA1                  | 100 $\pm$ 8.264 | 106.7 $\pm$ 8.209  |

\* $p < 0.05$  vs. repeated saline group.

**Supplementary Table S5.** Rates of changes in the immunoreactivity of pGluA1-S831 after intra-NAC infusion of Tat-peptides prior to the final injection of saline or cocaine

|                        | Repeated saline    | Repeated cocaine               |
|------------------------|--------------------|--------------------------------|
| Treatment              | Mean $\pm$ SEM     |                                |
| Vehicle                | 100 $\pm$ 2.634    | 200.74 $\pm$ 2.837*            |
| Tat-GluA1-c (0.2 nmol) | 98.36 $\pm$ 2.837  | 181.64 $\pm$ 11.163*           |
| Tat-GluA1-c (2.0 nmol) | 95.48 $\pm$ 0.856  | 176.46 $\pm$ 10.206*           |
| Tat-GluA1-i (0.2 nmol) | 106.96 $\pm$ 4.599 | 175.62 $\pm$ 3.267*            |
| Tat-GluA1-i (2.0 nmol) | 82.3 $\pm$ 3.578   | 99.82 $\pm$ 6.098 <sup>#</sup> |

\* $p < 0.05$  vs. repeated saline vehicle group; <sup>#</sup> $p < 0.05$  vs. repeated cocaine vehicle group.

**Supplementary Table S6.** Rates of changes in the immunoreactivity of PKG or GluA1 in the GluA1 precipitate after the intra-NAc infusion of Tat-peptides prior to the final injection of saline or cocaine

|           |                        | Repeated saline      | Repeated cocaine                  |
|-----------|------------------------|----------------------|-----------------------------------|
| Treatment |                        | Mean $\pm$ SEM       |                                   |
| PKG       | Vehicle                | 100 $\pm$ 4.293      | 214.933 $\pm$ 7.031 <sup>*</sup>  |
|           | Tat-GluA1-c (2.0 nmol) | 107.667 $\pm$ 8.019  | 169.267 $\pm$ 13.762 <sup>*</sup> |
|           | Tat-GluA1-i (2.0 nmol) | 112.933 $\pm$ 12.203 | 93.833 $\pm$ 6.912 <sup>#</sup>   |
| GluA1     | Vehicle                | 100 $\pm$ 1.02       | 97 $\pm$ 0.603                    |
|           | Tat-GluA1-c (2.0 nmol) | 98.1 $\pm$ 2.854     | 95.233 $\pm$ 6.306                |
|           | Tat-GluA1-i (2.0 nmol) | 100.8 $\pm$ 0.874    | 95.1 $\pm$ 4.912                  |

<sup>\*</sup> $p < 0.05$  vs. repeated saline vehicle group; <sup>#</sup> $p < 0.05$  vs. repeated cocaine vehicle group.

**Supplementary Table S7.** Changes in total distance travelled for 60 min after the intra-NAc infusion of Tat-peptides prior to the final injection of saline or cocaine

|             | Repeated saline      | Repeated cocaine                  |
|-------------|----------------------|-----------------------------------|
| Treatment   | Mean $\pm$ SEM       |                                   |
| Vehicle     | 1068.9 $\pm$ 144.882 | 17617.2 $\pm$ 1574.275*           |
| Tat-GluA1-c | 1093.5 $\pm$ 83.314  | 15075.6 $\pm$ 1531.533*           |
| Tat-GluA1-i | 863.6 $\pm$ 126.171  | 5649.4 $\pm$ 379.234 <sup>#</sup> |

\* $p < 0.05$  vs. repeated saline vehicle group; <sup>#</sup> $p < 0.05$  vs. repeated cocaine vehicle group.
